# Supplementary material for: Cleaning steel by devulcanizing rubber from used automotive tires
Source: Royal Society of Chemistry journal article supplement (doi:10.1039/d3su00218g), 2023-01-01
Supplement: d3su00218g1.pdf [file d3su00218g1.pdf]

## Clean Steel: Devulcanizing Rubber from Used Automotive Tires

Yang Chen,<sup>a</sup> Saleh Ibrahim,<sup>a</sup> Sijia Zheng,<sup>a</sup> Liam Wittenberg,<sup>a</sup> Spencer Chapple,<sup>a</sup> Griffin LaChapelle,<sup>a</sup> Cheok Hang Iao,<sup>a</sup> Adam Bourke,<sup>b</sup> and Michael A. Brook,<sup>a\*</sup>

### Electronic Supporting Information

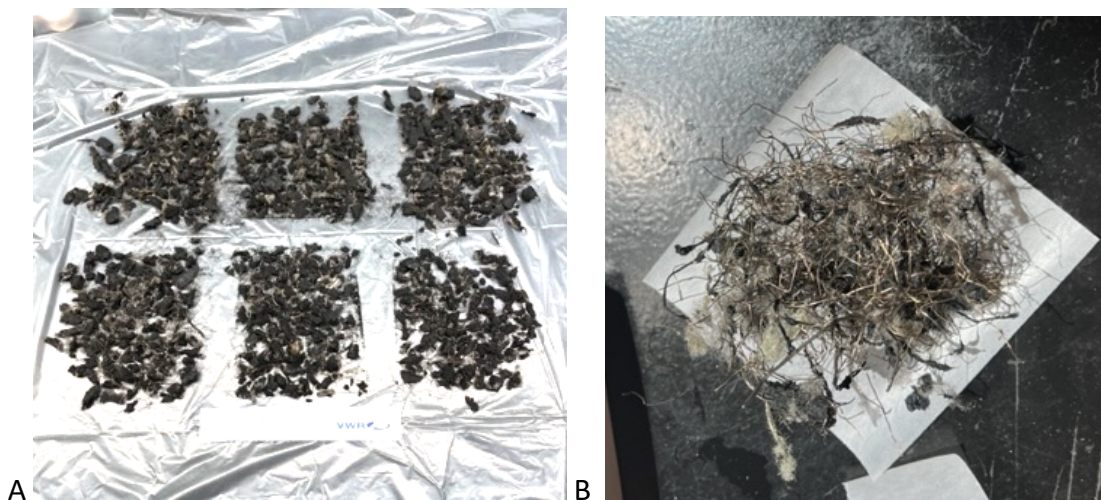

Figure S1. A) Sorting a single sample (~ 1 kg) received. It was spread as evenly as possible over a large surface area, separated into approximately 6 equal volumes. There was no average sample even within this one batch from one supplier. B) Batch C – a very fluff rich sample of steel/wire.

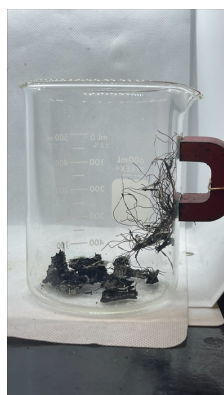

Figure S2. Magnetic separation of wires from raw rubber/wire mix – analogues separation was done at other stages of the cleaning process.

Table S1. Combined mass of 5 randomly selected rubber coated wires before and after combustion

| Sample | Mass before combustion | Mass after combustion | Weight% rubber on sample |
|--------|------------------------|-----------------------|--------------------------|
| 1      | 0.0895                 | 0.0871                | 2.7                      |
| 2      | 0.0738                 | 0.0689                | 6.6                      |
| 3      | 0.1054                 | 0.097                 | 8.0                      |
| 4      | 0.1086                 | 0.1038                | 4.4                      |
| 5      | 0.1291                 | 0.1128                | 12.6                     |
| 6      | 0.1173                 | 0.1109                | 5.5                      |
| 7      | 0.0734                 | 0.0713                | 2.9                      |
| 8      | 0.1251                 | 0.1053                | 15.8                     |

<sup>a</sup> Samples 1-3 were measured on 1 day and samples 4-8 on another. All came from Batch Ai (Figure 3).

Table S2. Mass of rubber before and after swelling in toluene overnight.

| Sample <sup>a</sup> | Mass before swelling | Mass after swelling | Weight% swelling |
|---------------------|----------------------|---------------------|------------------|
| Tread               |                      |                     |                  |
| 1                   | 1.8                  | 5.318               | 195              |
| 2                   | 3.041                | 8.051               | 166              |
| 3                   | 1.668                | 4.648               | 179              |
|                     |                      |                     | 180 wt%          |
| Sidewall            |                      |                     |                  |
| 1                   | 1.129                | 2.611               | 131              |
| 2                   | 3.249                | 8.201               | 152              |
| 3                   | 1.332                | 3.214               | 141              |
|                     |                      |                     | 142 wt%          |

<sup>a</sup> The constitution of the tire components, included: truck tread isoprene/natural rubber; butadiene rubber; truck sidewall isobutene isoprene rubber.<sup>1</sup>

1. S. Zheng, M. Liao, Y. Chen and M. A. Brook, *Green Chem.*, 2020, **22**, 94-102.
